# Supplementary material for: Room-Temperature, Ionic-Liquid-Enhanced, Beta-Cyclodextrin-Based, Molecularly Imprinted Polymers for the Selective Extraction of Abamectin
Source: MDPI journal article supplement (doi:10.3390/nano12061017), 2022-03-20
Supplement: s1 [file s1]

# Room-Temperature, Ionic-Liquid-Enhanced, Beta-Cyclodextrin-Based, Molecularly Imprinted Polymers for the Selective Extraction of Abamectin

Saqib Farooq <sup>1</sup>, Bochang Chen <sup>1</sup>, Shakeel Ahmad <sup>1</sup>, Ihsan Muhammad <sup>1</sup>, Quaid Hussain <sup>2</sup> and Haiyan Wu <sup>1,\*</sup>

<sup>1</sup> Guangxi Key Laboratory of Agric-Environment and Agric-Products Safety, Agricultural College of Guangxi University, Nanning 530004, China; saqibhort@gmail.com (S.F.); 15677802394@163.com (B.C.); shakeel1287@hotmail.com (S.A.); ihsanagrarian@yahoo.com (I.M.)

<sup>2</sup> State Key Laboratory of Subtropical Silviculture, Zhejiang A&F University, 666 Wusu Street, Hangzhou 311300, China; quaid\_hussain@yahoo.com

\* Correspondence: whyzxb@gmail.com

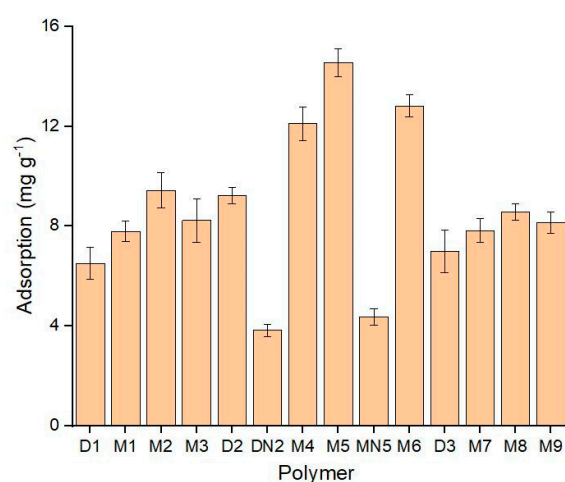

**Figure S1.** Adsorption data of prepared MIPs and NIPs for ABM

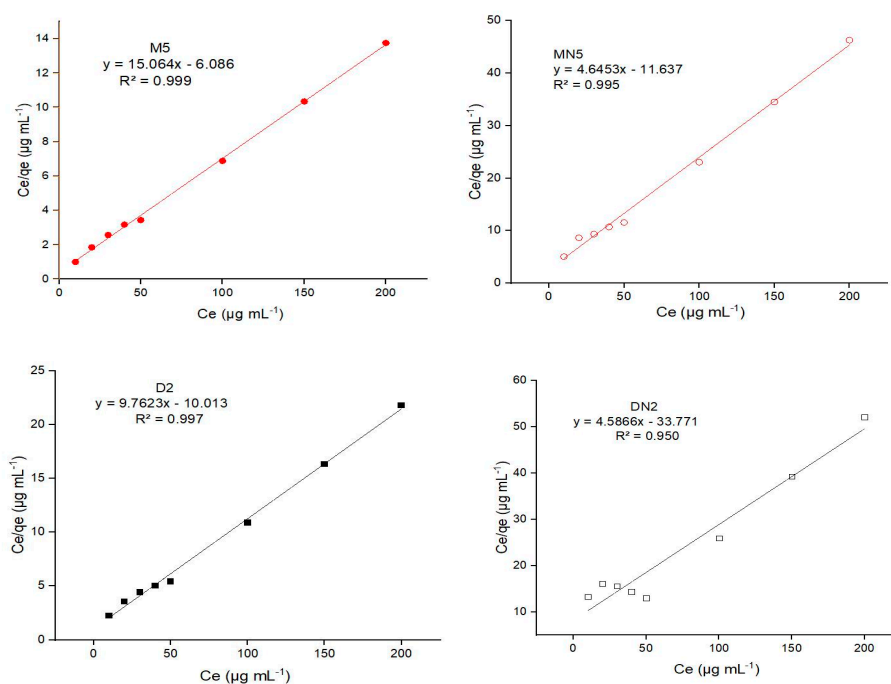

**Figure S2.** Linear fitted plots of  $C_e/q_e$  versus  $C_e$  for Langmuir

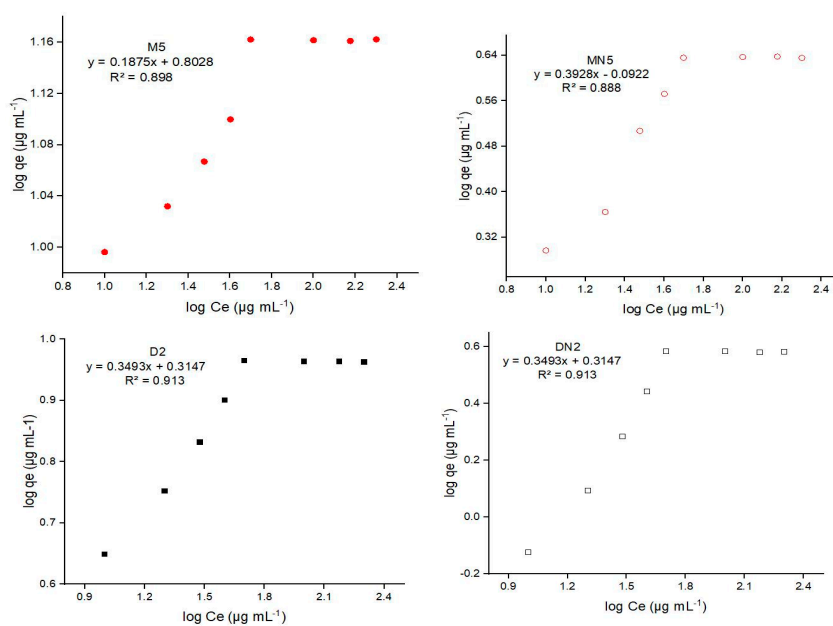

**Figure S3.** Linear fitted plots of  $\log q$  versus  $\log C_e$  for Freundlich

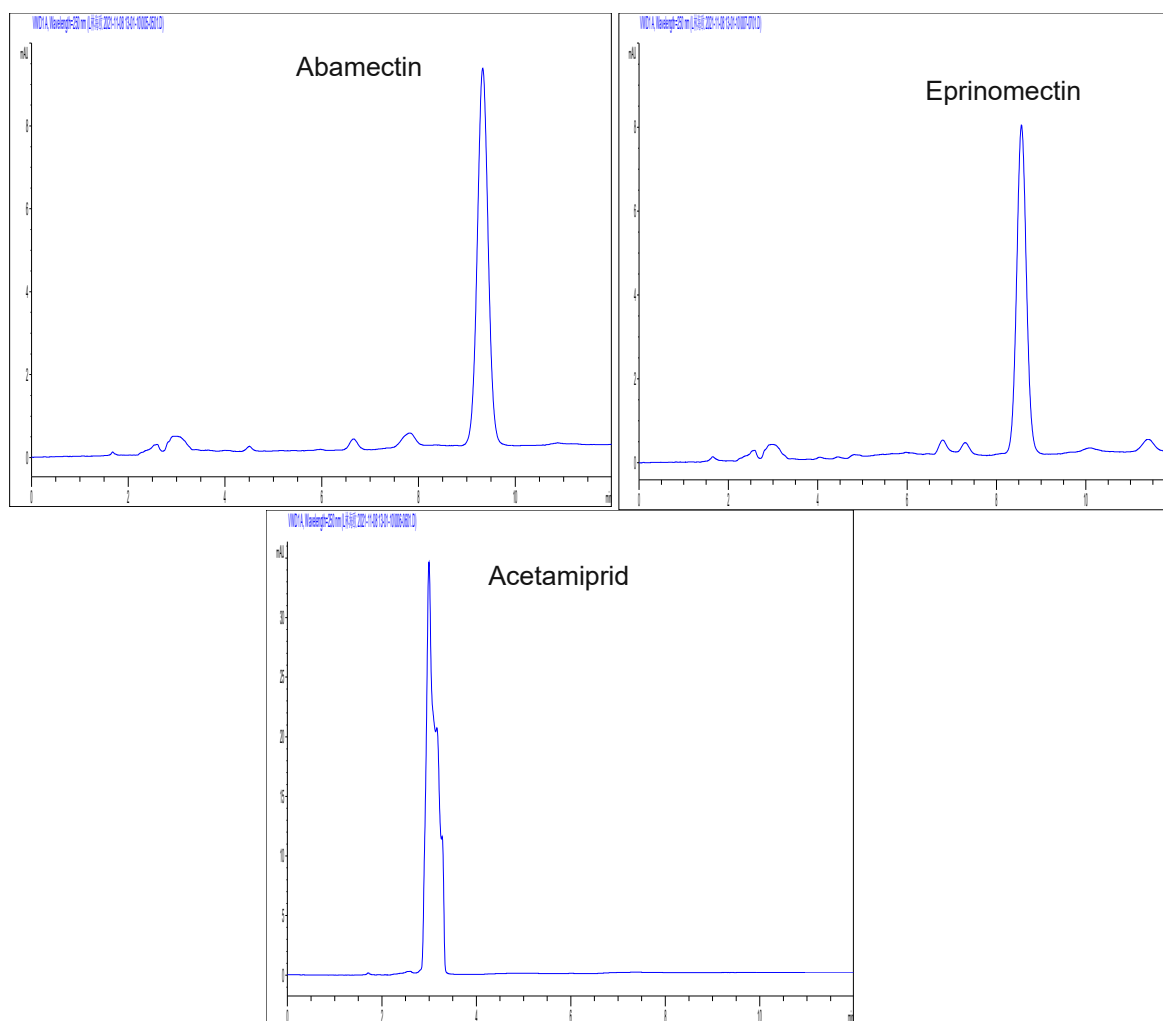

**Figure S4.** HPLC-UV chromatograph for abamectin, eprinomectin and acetamiprid.

Table S1: Details of polymerization components

| Name                                          | Molecular Formula                                             | Molecular weight | Role               |
|-----------------------------------------------|---------------------------------------------------------------|------------------|--------------------|
| Abamectin                                     | C <sub>49</sub> H <sub>74</sub> O <sub>14</sub>               | 887.11           | Template           |
| 1-butyl-3-methylimidazolium tetrafluoroborate | C <sub>8</sub> H <sub>15</sub> BF <sub>4</sub> N <sub>2</sub> | 226.02           | Solvent            |
| Dimethyl sulfoxide                            | C <sub>2</sub> H <sub>6</sub> OS                              | 78.13            | Solvent            |
| 1,6-hexamethylene diisocyanate                | C <sub>8</sub> H <sub>12</sub> N <sub>2</sub> O <sub>2</sub>  | 168.19           | Cross-linker       |
| Beta-cyclodextrin                             | C <sub>42</sub> H <sub>70</sub> O <sub>35</sub>               | 1134.99          | Functional monomer |
